# Supplementary material for: Phase transformation from α-Fe2O3to Fe3O4and LiFeO2by the self-reduction of Fe(iii) in Prussian red in the presence of alkali hydroxides: investigation of the phase dependent morphological and magnetic properties
Source: Royal Society of Chemistry journal article supplement (doi:10.1039/c7ce01342f), 2017-01-01
Supplement: c7ce01342f1.pdf [file c7ce01342f1.pdf]

## Phase Transformation from $\alpha$ -Fe<sub>2</sub>O<sub>3</sub> to Fe<sub>3</sub>O<sub>4</sub> and LiFeO<sub>2</sub> by self-reduction of Fe (III) in Prussian Red in the presence of Alkali Hydroxides: Investigation on the Phase dependent Morphological and Magnetic properties

K Palani Thirupathi<sup>a</sup> and Devaraj Nataraj<sup>a,b,\*</sup>

\* Corresponding Author email: [de.natraj2011@gmail.com](mailto:de.natraj2011@gmail.com)

**Table S1.** The reaction parameters and precursor's mole concentrations for the various phases and morphologies of as prepared iron oxides.

| Sample code | Iron Precursor K <sub>3</sub> [Fe(CN) <sub>6</sub> ] (molL <sup>-1</sup> )* | Alkali Hydroxide name | Alkali Hydroxide (molL <sup>-1</sup> )* | Hydrothermal reaction Temperature (°C) | Hydrothermal reaction Time (h) | Crystalline Phase                                                          | Morphology                    |
|-------------|-----------------------------------------------------------------------------|-----------------------|-----------------------------------------|----------------------------------------|--------------------------------|----------------------------------------------------------------------------|-------------------------------|
| F1N1        | 0.01                                                                        | NaOH                  | 1                                       | 180                                    | 12                             | $\alpha$ -Fe <sub>2</sub> O <sub>3</sub>                                   | Hexagonal disc                |
| F1N5        | 0.01                                                                        | NaOH                  | 5                                       | 180                                    | 12                             | $\alpha$ -Fe <sub>2</sub> O <sub>3</sub>                                   | Hexagonal disc                |
| F1N7        | 0.01                                                                        | NaOH                  | 7                                       | 180                                    | 12                             | $\alpha$ -Fe <sub>2</sub> O <sub>3</sub>                                   | Hexagonal disc                |
| F1N13       | 0.01                                                                        | NaOH                  | 13                                      | 180                                    | 12                             | $\alpha$ -Fe <sub>2</sub> O <sub>3</sub>                                   | Hierarchical sphere           |
| F6N5        | 0.06                                                                        | NaOH                  | 5                                       | 180                                    | 12                             | $\alpha$ -Fe <sub>2</sub> O <sub>3</sub><br>Fe <sub>3</sub> O <sub>4</sub> | Agglomerated ring with sphere |
| F9N5        | 0.09                                                                        | NaOH                  | 5                                       | 180                                    | 12                             | Fe <sub>3</sub> O <sub>4</sub>                                             | Agglomerated Sphere           |
| F1L1        | 0.01                                                                        | LiOH.H <sub>2</sub> O | 1                                       | 180                                    | 12                             | LiFe <sub>5</sub> O <sub>8</sub>                                           | Mixed flower                  |
| F1L2        | 0.01                                                                        | LiOH.H <sub>2</sub> O | 2                                       | 180                                    | 12                             | LiFeO <sub>2</sub>                                                         | Un matured sphere             |
| F1L3        | 0.01                                                                        | LiOH.H <sub>2</sub> O | 3                                       | 180                                    | 12                             | LiFeO <sub>2</sub>                                                         | Un matured sphere             |
| F1L7        | 0.01                                                                        | LiOH.H <sub>2</sub> O | 7                                       | 180                                    | 12                             | LiFeO <sub>2</sub>                                                         | Irregular sphere              |
| F1N3        | 0.01                                                                        | NaOH                  | 3                                       | 180                                    | 6                              | $\alpha$ -Fe <sub>2</sub> O <sub>3</sub>                                   | Hexagonal disc                |
| F10N6       | 0.1                                                                         | NaOH                  | 6                                       | 180                                    | 6                              | Fe <sub>3</sub> O <sub>4</sub>                                             | Sphere                        |
| F9N11       | 0.09                                                                        | NaOH                  | 11                                      | 180                                    | 6                              | Fe <sub>3</sub> O <sub>4</sub>                                             | Irregular particle            |
| F1L5        | 0.01                                                                        | LiOH.H <sub>2</sub> O | 5                                       | 180                                    | 6                              | LiFeO <sub>2</sub>                                                         | Irregular sphere              |

\* Both reactants were dissolved in 15 ml of double distilled water

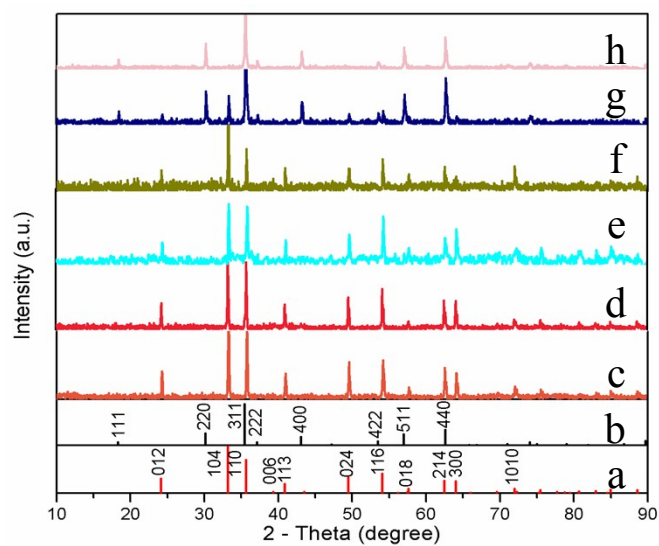

**Figure S1.** Powder X- Ray Diffraction pattern of phase evaluation from hematite ( $\alpha\text{-Fe}_2\text{O}_3$ ) to magnetite ( $\text{Fe}_3\text{O}_4$ ) under different concentrations of  $\text{K}_3[\text{Fe}(\text{CN})_6]$  and  $\text{NaOH}$ . The JCPDS patterns (a) 87-1166 and (b) 65-3107 are represents the hematite and magnetite phases of iron oxides respectively. The various reactant concentrations are labeled as follows, (c) F1N1, (d) F1N5, (e) F1N7, (f) F1N13, (g) F6N5 and (h) F9N5.

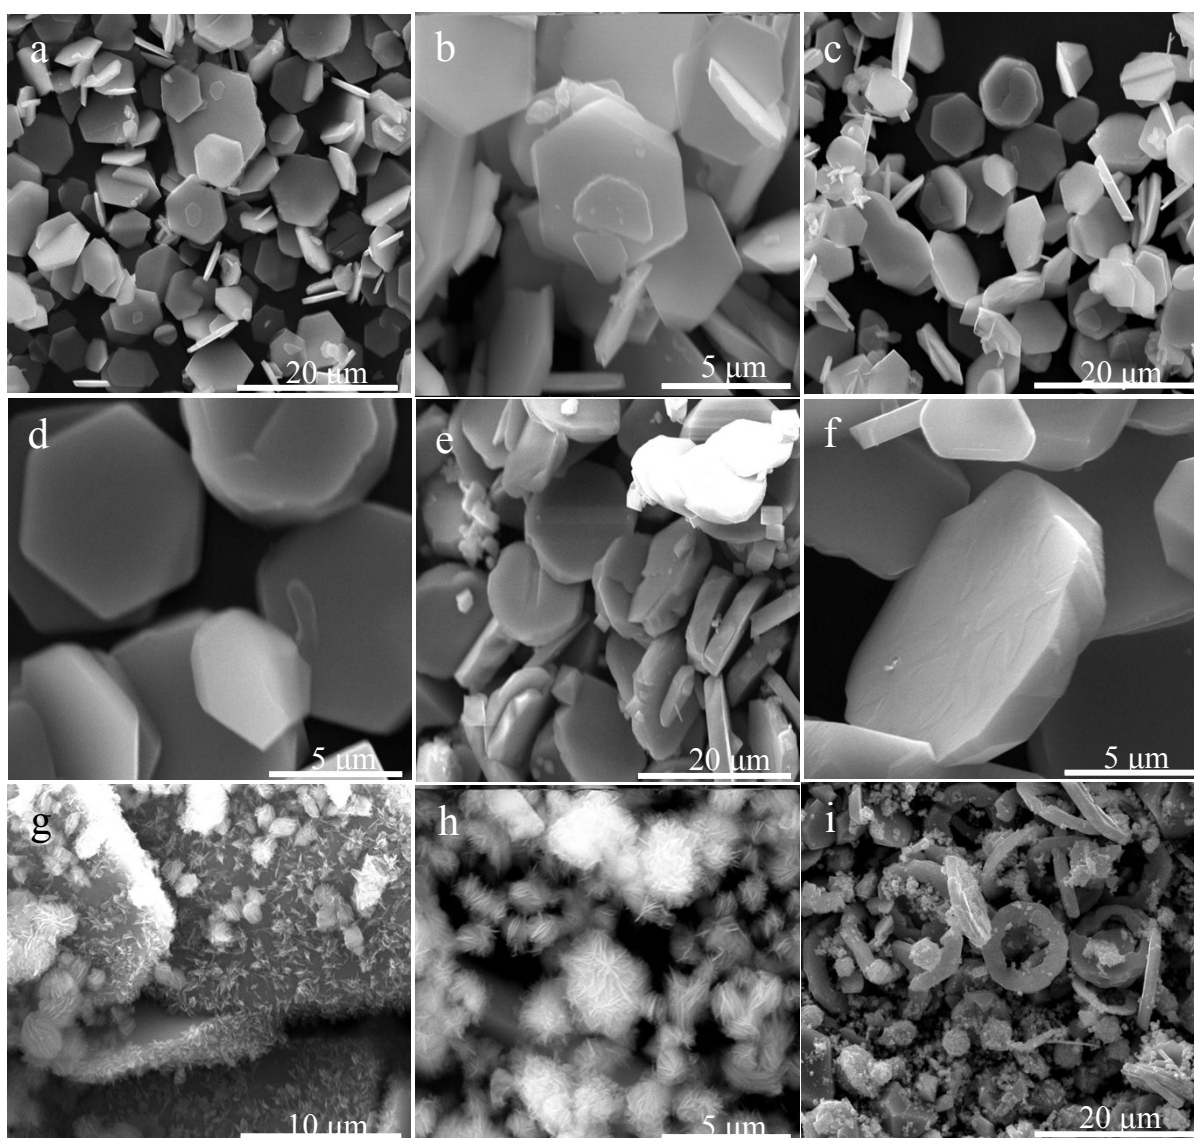

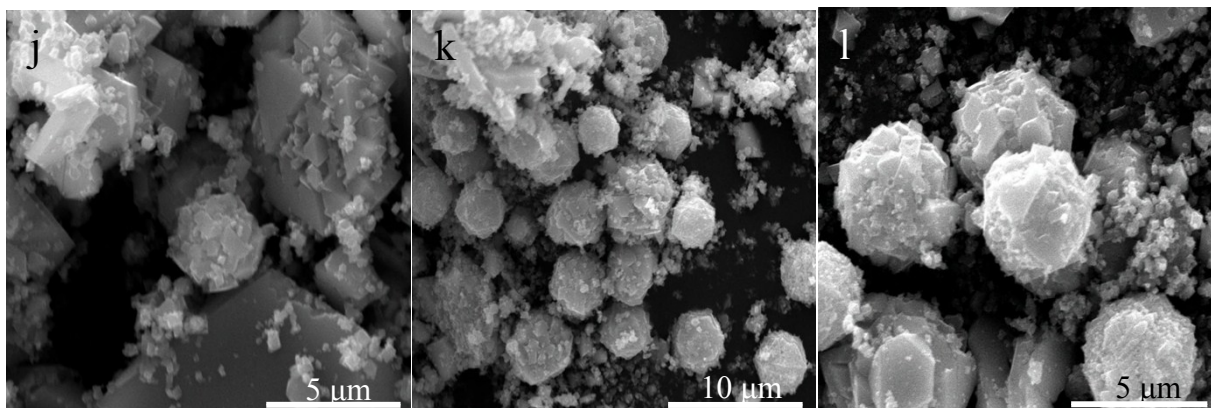

**Figure S2.** Scanning Electron Microscope images for various molar concentrations of  $K_3[Fe(CN)_6]$  and NaOH based iron oxides. The images are labeled based on its sample code as follows, (a-b) F1N1, (c-d) F1N5, (e-f) F1N7, (g-h) F1N13, (i-j) F6N5 and (k-l) F9N5.

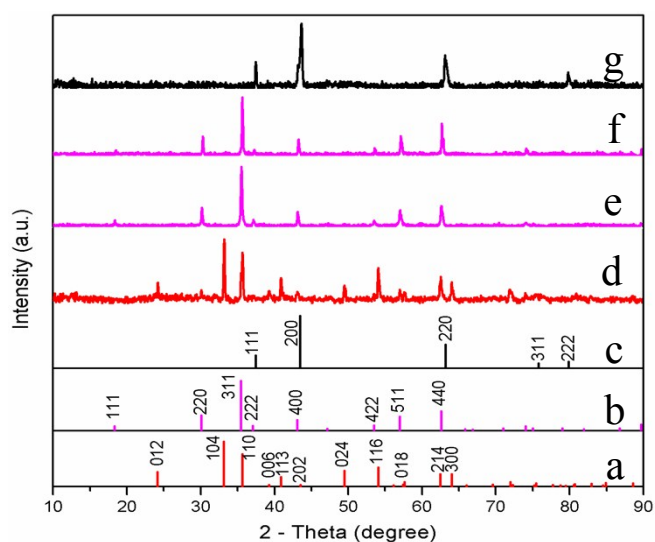

**Figure S3.** XRD patterns of Reaction time (6hrs) dependent prepared iron oxides. Fig (a-c) shows the JCPDS patterns of  $\alpha\text{-Fe}_2\text{O}_3$  (87-1166),  $\text{Fe}_3\text{O}_4$  (65-3107) and  $\text{LiFeO}_2$  (74-2284) microcrystalites. The remaining patterns shows the (d) hematite hexagonal disc (F1N3-6), (e) magnetite truncated sphere (F10N6-6), (f) magnetite irregular particle (F9N11-6) and (g) irregular spherical  $\text{LiFeO}_2$  (F1L5-6) crystalline structure.

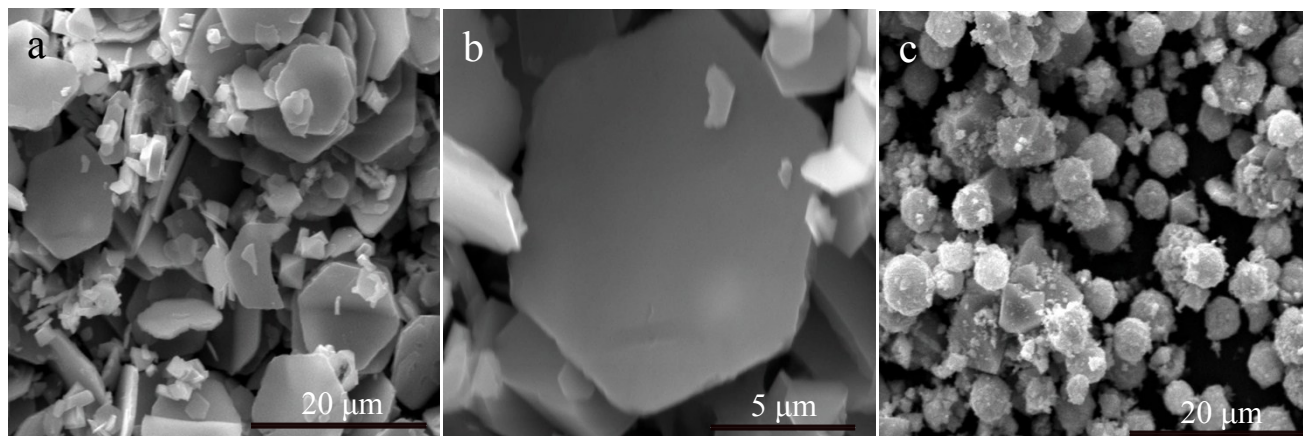



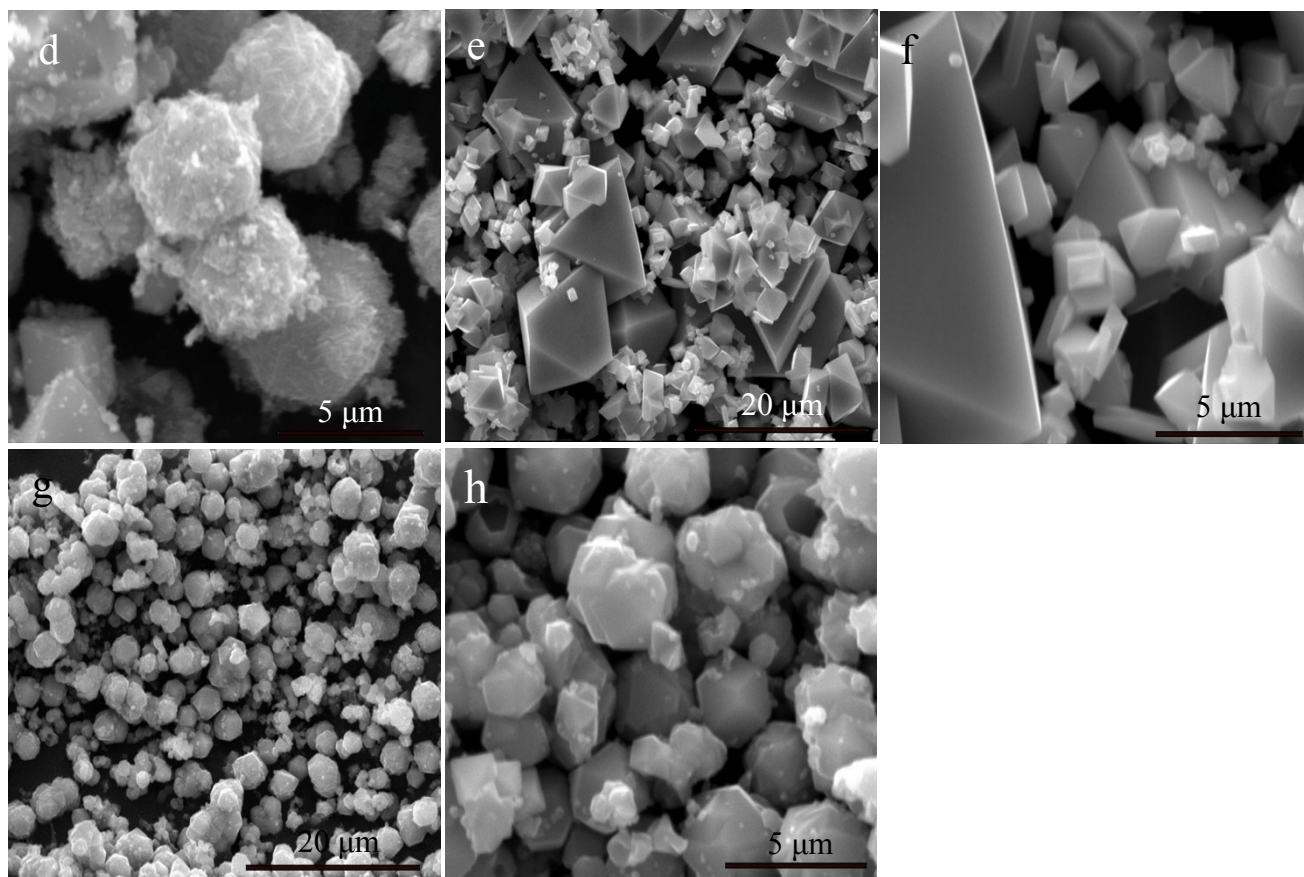

**Figure S4.** SEM images of iron oxides micro structures prepared from the 6hrs reaction time with 180°C reaction temperature. The image details are represents with corresponding sample codes as follows, (a-b) F1N3-6, (c-d) F10N6-6, (e-f) F9N11-6 and (g-h) F1L5-6.

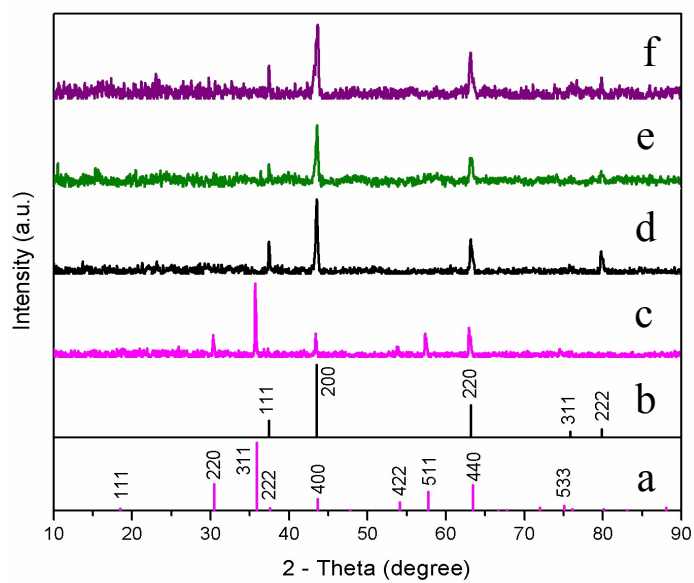

**Figure S5.** X-Ray diffraction patterns of different concentrations of  $\text{LiOH}\cdot\text{H}_2\text{O}$  based  $\text{LiFeO}_2$  oxides. Fig.(a and b) shows the JCPDS card number for  $\text{LiFe}_5\text{O}_8$  (76-1590) and  $\text{LiFeO}_2$  (74-2284) phases. Various molar concentrations are shown as (c)  $1\text{ molL}^{-1}$  (F1L1), (d)  $2\text{ molL}^{-1}$  (F1L2), (e)  $3\text{ molL}^{-1}$  (F1L3) and (f)  $7\text{ molL}^{-1}$  (F1L7).

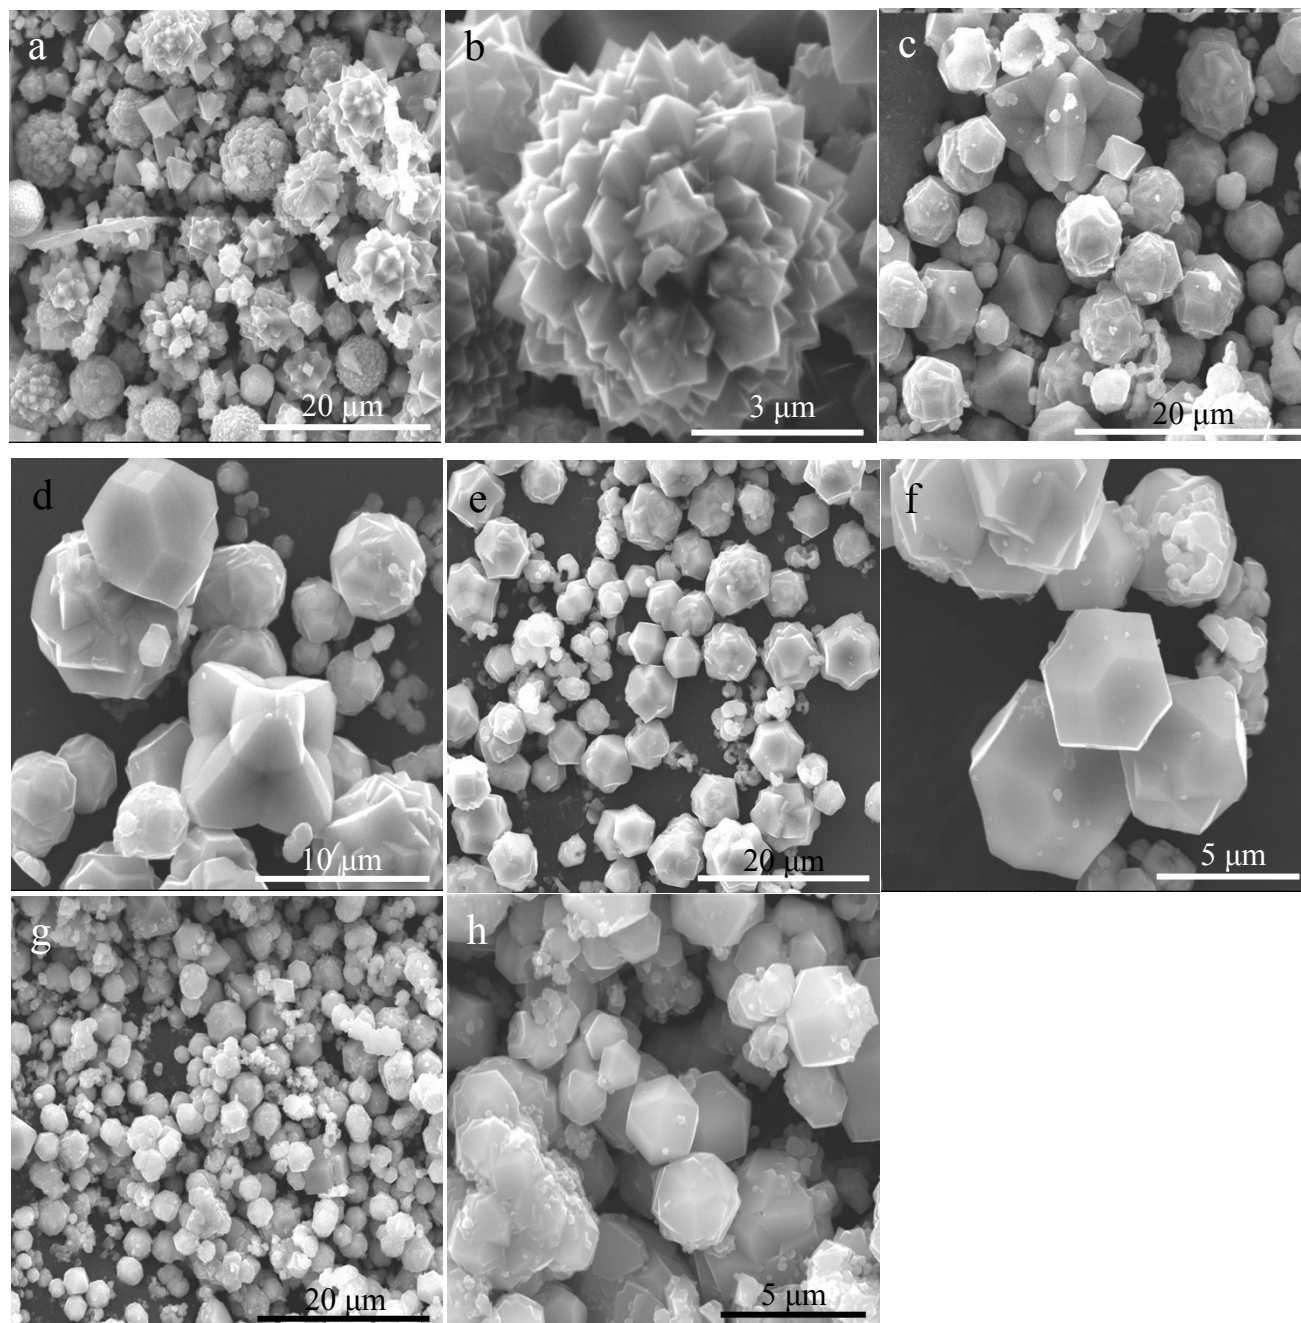

**Figure S6.** Scanning Electron Microscope images for various mole concentrations of  $\text{LiOH}\cdot\text{H}_2\text{O}$  with constant  $\text{K}_3[\text{Fe}(\text{CN})_6]$  iron (III) source. The images with two different magnifications are labeled as follows, (a-b)  $1\text{ molL}^{-1}$  (F1L1), (c-d)  $2\text{ molL}^{-1}$  (F1L2), (e-f)  $3\text{ molL}^{-1}$  (F1L3) and (g-h)  $7\text{ molL}^{-1}$  (F1L7).

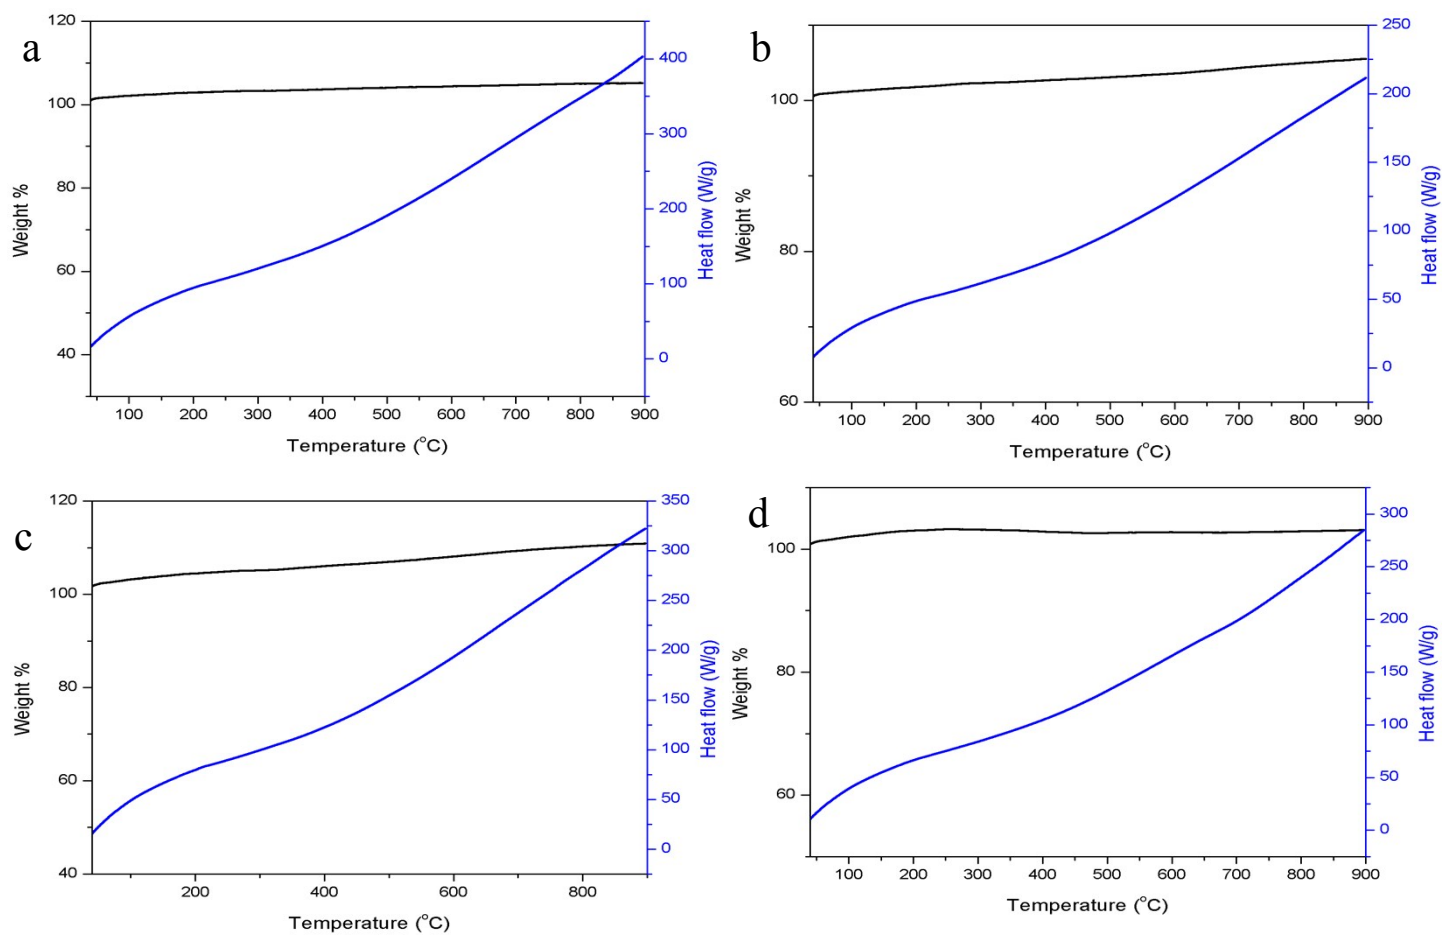

**Figure S7.** TG and DSC Spectra of samples code (a) F1N3, (b) F10N6, (c) F9N11 and (d) F1L5.
